# Supplementary material for: Genome-wide identification and expression profile analysis of the NF-Y transcription factor gene family in Eucalyptus grandis
Source: Research Square preprint supplement (doi:10.21203/rs.3.rs-4703272/v1), 2024-07-31
Supplement: Supplementary file 1 [file e673b3f772a4377e1ef2f2c9.docx]

| Name | Transcript  Name | DNA length | CDS length | Peptide residue | WM  (Kd) | pI | Locus | Chromosomes  Position |
| --- | --- | --- | --- | --- | --- | --- | --- | --- |
| NF-YA |  |  |  |  |  |  |  |  |
| EgrNF-YA1 | Eucgr.A02381.1 | 4923 | 912 | 304 | 33.43 | 9.48 | Chr01 | 39266249-39271172 |
| EgrNF-YA2  EgrNF-YA3  EgrNF-YA4  EgrNF-YA5  EgrNF-YA6  EgrNF-YA7  NF-YB  EgrNF-YB1  EgrNF-YB2  EgrNF-YB3  EgrNF-YB4  EgrNF-YB5  EgrNF-YB6  EgrNF-YB7  EgrNF-YB8  EgrNF-YB9  EgrNF-YB10  EgrNF-YB11  EgrNF-YB12  EgrNF-YB13  EgrNF-YB14  EgrNF-YB15  EgrNF-YB16  NF-YC  EgrNF-YC1  EgrNF-YC2  EgrNF-YC3  EgrNF-YC4  EgrNF-YC5  EgrNF-YC6  EgrNF-YC7  EgrNF-YC8 | Eucgr.A02570.1  Eucgr.C00842.1  Eucgr.K01943.1  Eucgr.F03169.1  Eucgr.J00764.1  Eucgr.K01921.1  Eucgr.A01179.1  Eucgr.B00669.1  Eucgr.B01293.1  Eucgr.B01299.1  Eucgr.B01300.1  Eucgr.B01303.1  Eucgr.B01940.1  Eucgr.L00153.1  Eucgr.E03857.1  Eucgr.F02051.1  Eucgr.G02796.1  Eucgr.H01189.1  Eucgr.H03892.1  Eucgr.H04502.1  Eucgr.I00185.1  Eucgr.J00499.1  Eucgr.B00106.1  Eucgr.D01871.1  Eucgr.E00570.1  Eucgr.F01474.1  Eucgr.G03198.1  Eucgr.H04476.1  Eucgr.J00664.1Eucgr.K02714.1 | 5211  6915  4782  5111  4067  9611  5062  4206  363  282  363  433  483  1477  606  927  4385  1997  978  510  714  2741  5425 357 399  2382  4300  2631 2241  4166 | 978  1017  606  777  966  948    534  471  363  282  363  345  483  666  606  927  600  555  552  570  714  858  810  357 399  798  645  762  795  705 | 326  339  202  259  322  316  178  157  121  94  121  115  161  222  202  309  200  185  184  170  238  286  270  119  133  266  215  254  265  235 | 35.34  37.21  22.24  29.57  34.72  35.25  19.11  17.36  13.65  10.64  13.59  13.05  18.18  23.08  22.31  32.85  22.16  20.37  20.55  19.10  26.87  30.98  30.02  12.83  14.67  29.66  24.23  28.14  28.73  25.44 | 9.13  9.43  7.90  9.29  6.76  9.53  6.44  4.70  5.90  8.37  5.89  5.89  5.17  5.91  5.56  7.69  8.59  5.84  5.89  5.26  6.30  8.86  5.59  6.73  8.82  5.62  9.30  5.30  4.49  5.05 | Chr01  Chr03  Chr05  Chr06  Chr10  Chr11  Chr01  Chr02  Chr02  Chr02  Chr02  Chr02  Chr02Chr04  Chr05  Chr06  Chr07  Chr08  Chr08  Chr08  Chr09  Chr10  Chr02  Chr04  Chr05  Chr06  Chr07  Chr08  Chr10  Chr11 | 40871807-40877018  13879073-13885988  31968551-31973333  43547878-43552989  8053229-8057296  25456393-25466004  24459334-24464396  6999487-7003693  20499626-20499989  20570932-20571214  20589022-20589385  20605624-20606057  36132078-36132561  20329570-20331047  73093680-73094286  27056531-27057458  49153405-49157790  13701266-13703263  53309416-53310394  60897292-60897802  3806528-3807242  5349209-5351950  459824-465249  32254203-32254560  5429231-5429630  19881307-19883689  52859040-52863340  60666762-60669393  7199557-7201798  34667163-34671329 |
